# Supplementary material for: Small molecule splicing modifiers with systemic HTT-lowering activity
Source: PubMed Central journal article supplement (PMC8674292; doi:10.1038/s41467-021-27157-z), 2021-12-15
Supplement: 41467_2021_27157_MOESM1_ESM.pdf [file 41467_2021_27157_MOESM1_ESM.pdf]

## Supplementary Information for “Small molecule splicing modifiers with systemic HTT-lowering activity”

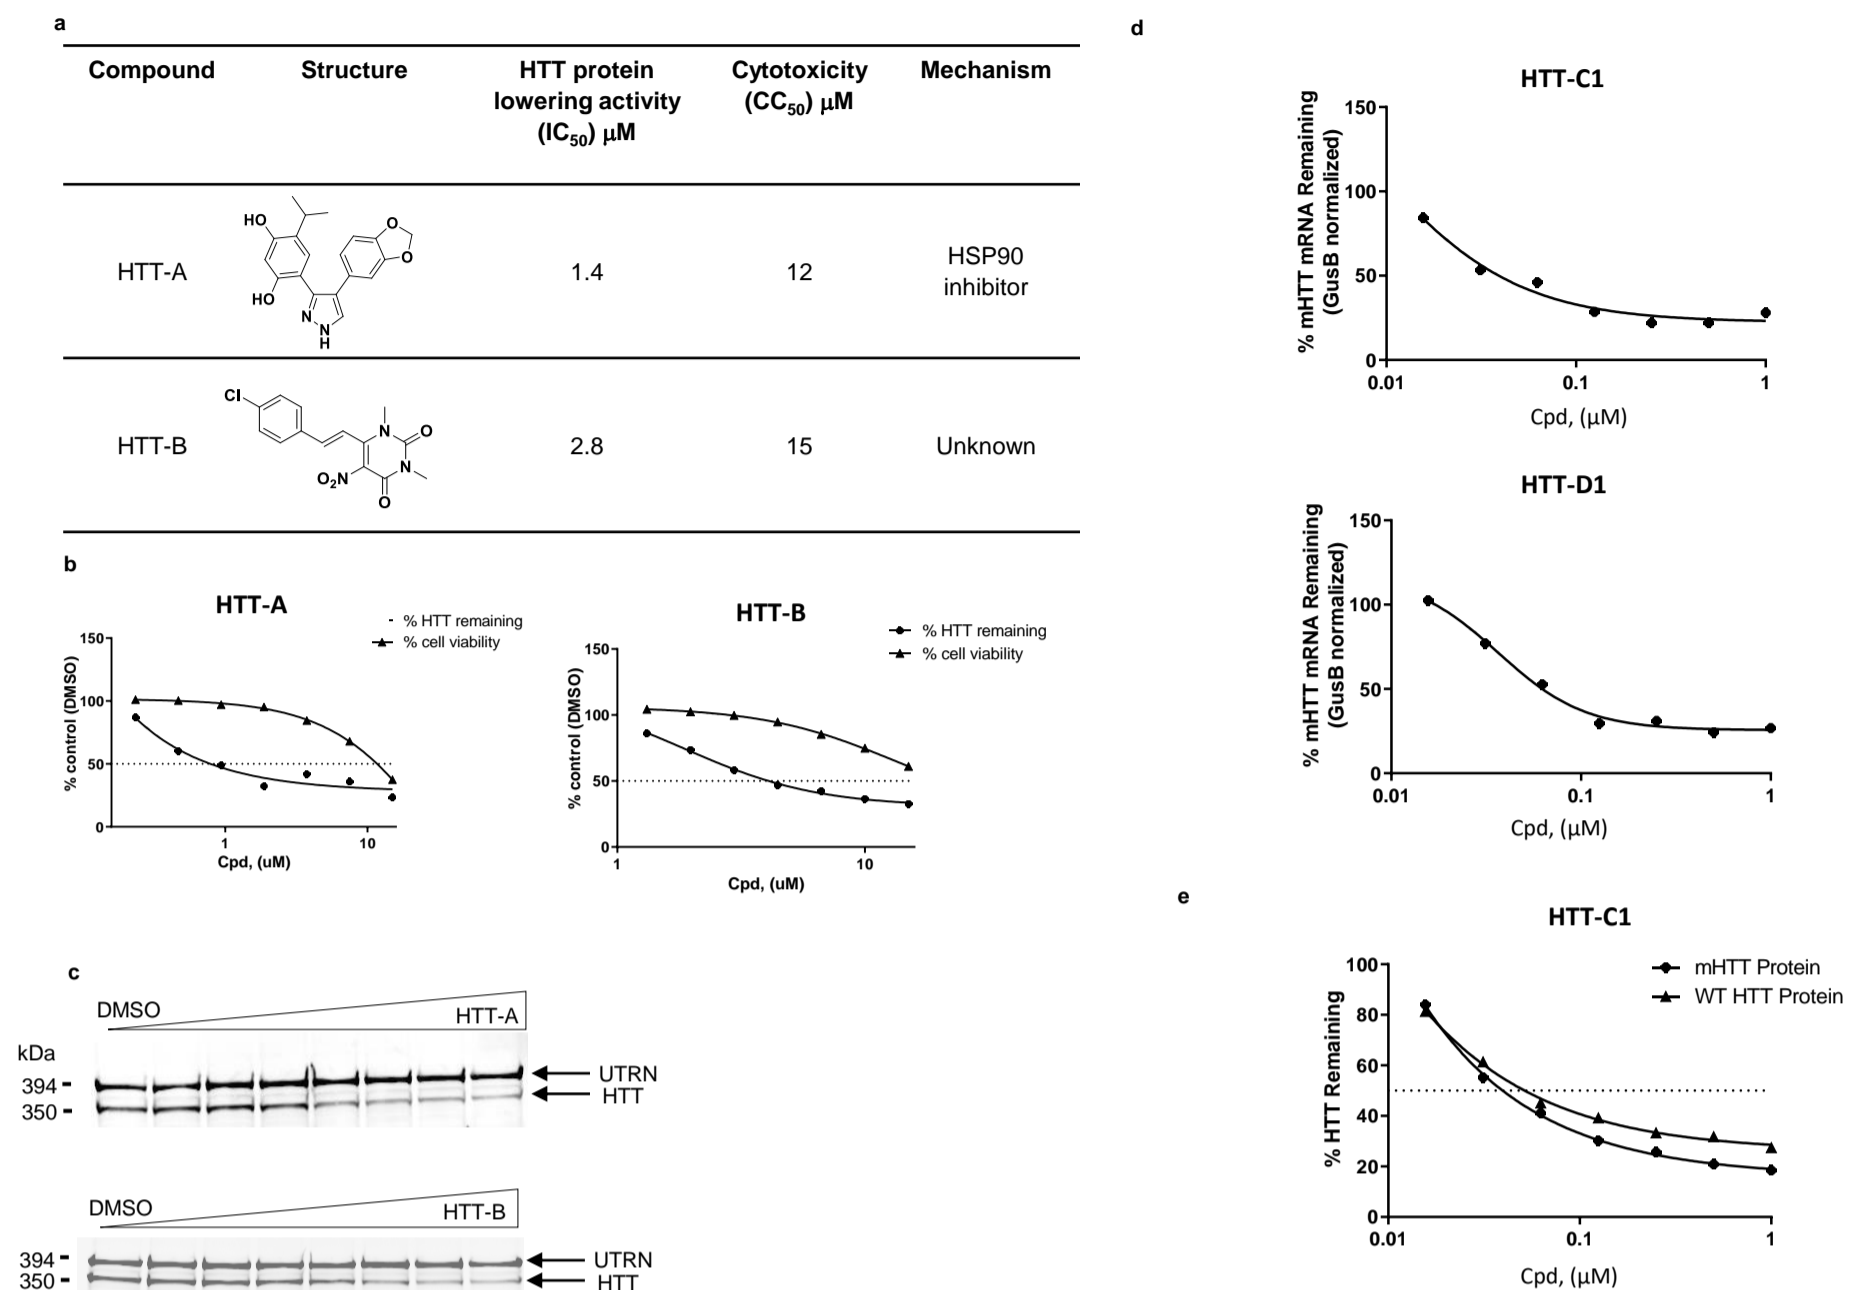

### Supplementary fig. 1. Compounds identified with huntingtin (HTT)-lowering activity

**a** Chemical structure of HTT-A and HTT-B. **b** Electrochemiluminescence (ECL) analysis of total HTT protein from fibroblasts isolated from a homozygous patient with Huntington’s disease (HD) (GM04857) after 96 hrs of continuous treatment with HTT-A and HTT-B (0.01–10.0 μM). Representative graphs show percent HTT remaining relative to the dimethyl sulphoxide (DMSO) control. Cell-viability assays were performed in parallel. Data represent mean of two (n=2) biologically independent samples per data point. **c** Western blot of HTT protein in patient fibroblasts after treatment with HTT-A and HTT-B. Utrophin (UTRN) was used as a loading control. The western blot data was with a representative compound from each class (tested at multiple concentrations) from a single experiment. **d** Reverse transcription-quantitative polymerase chain reaction (RT-qPCR) analysis of *HTT* mRNA in patient fibroblasts after 24 hrs of treatment with HTT-C1 and HTT-D1 (0.01–1.0 μM). Representative graphs show percent *HTT* mRNA remaining normalised to beta-glucuronidase (*GUSB*) mRNA levels. Data represent mean of two (n=2) biologically independent samples per data point. **e** ECL analysis of wild-type (wt) and mutant HTT protein from control fibroblasts after treatment with HTT-C1 (0.01–1.0 μM). Data represent mean of two (n=2) biologically independent samples per data point.

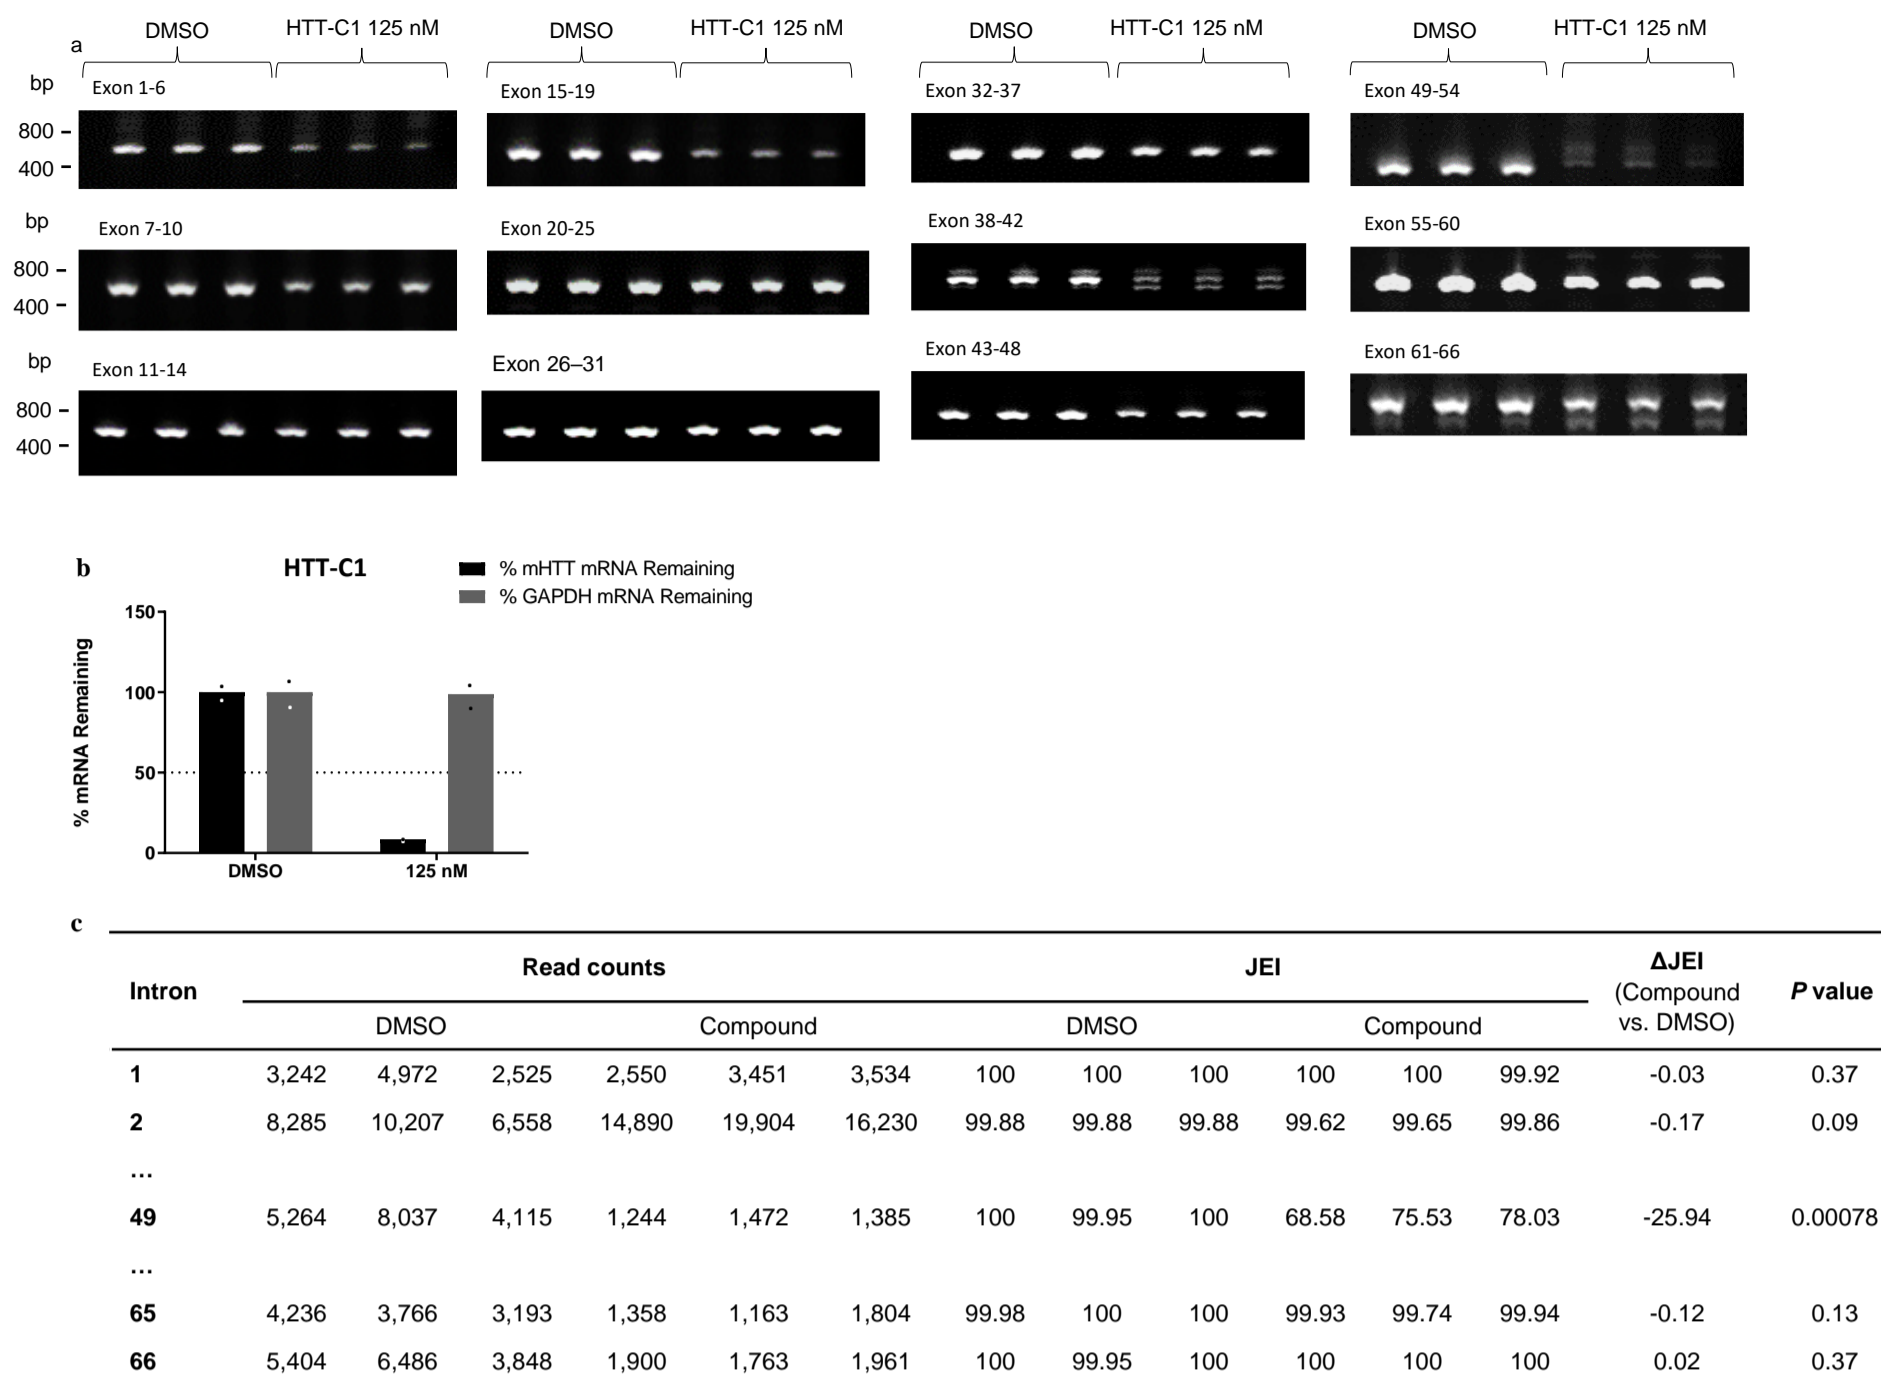

## Supplementary fig. 2. Effect of compounds on splicing of the huntingtin (*HTT*) mRNA

**a** Reverse transcription-polymerase chain reaction (RT-PCR) analysis of *HTT* mRNA after 24-hr treatment with 125 nM HTT-C1 or dimethyl sulphoxide (DMSO) in patient derived B-lymphocytes (GM04856 cells). **b** Reverse transcription-quantitative polymerase chain reaction (RT-qPCR) analysis of *HTT* mRNA in B-lymphocytes from the same patient (GM04856 cells) after 24 hrs of treatment with DMSO control or HTT-C1 (125 nM).

Representative graphs show percent *HTT* remaining relative to DMSO control; normalised to housekeeping gene, glyceraldehyde-3-phosphate dehydrogenase (*GAPDH*). Data represent mean of two (n=2) biologically independent samples per data point. **c** Junction expression index (JEI) of intron 49 and a selection of other introns. *P*-value is based on a two-sided Student's t-test without adjustments for multiple comparisons.  $\Delta$ JEI is the difference of average JEI for compound group (n=3) and DMSO group (n=3).

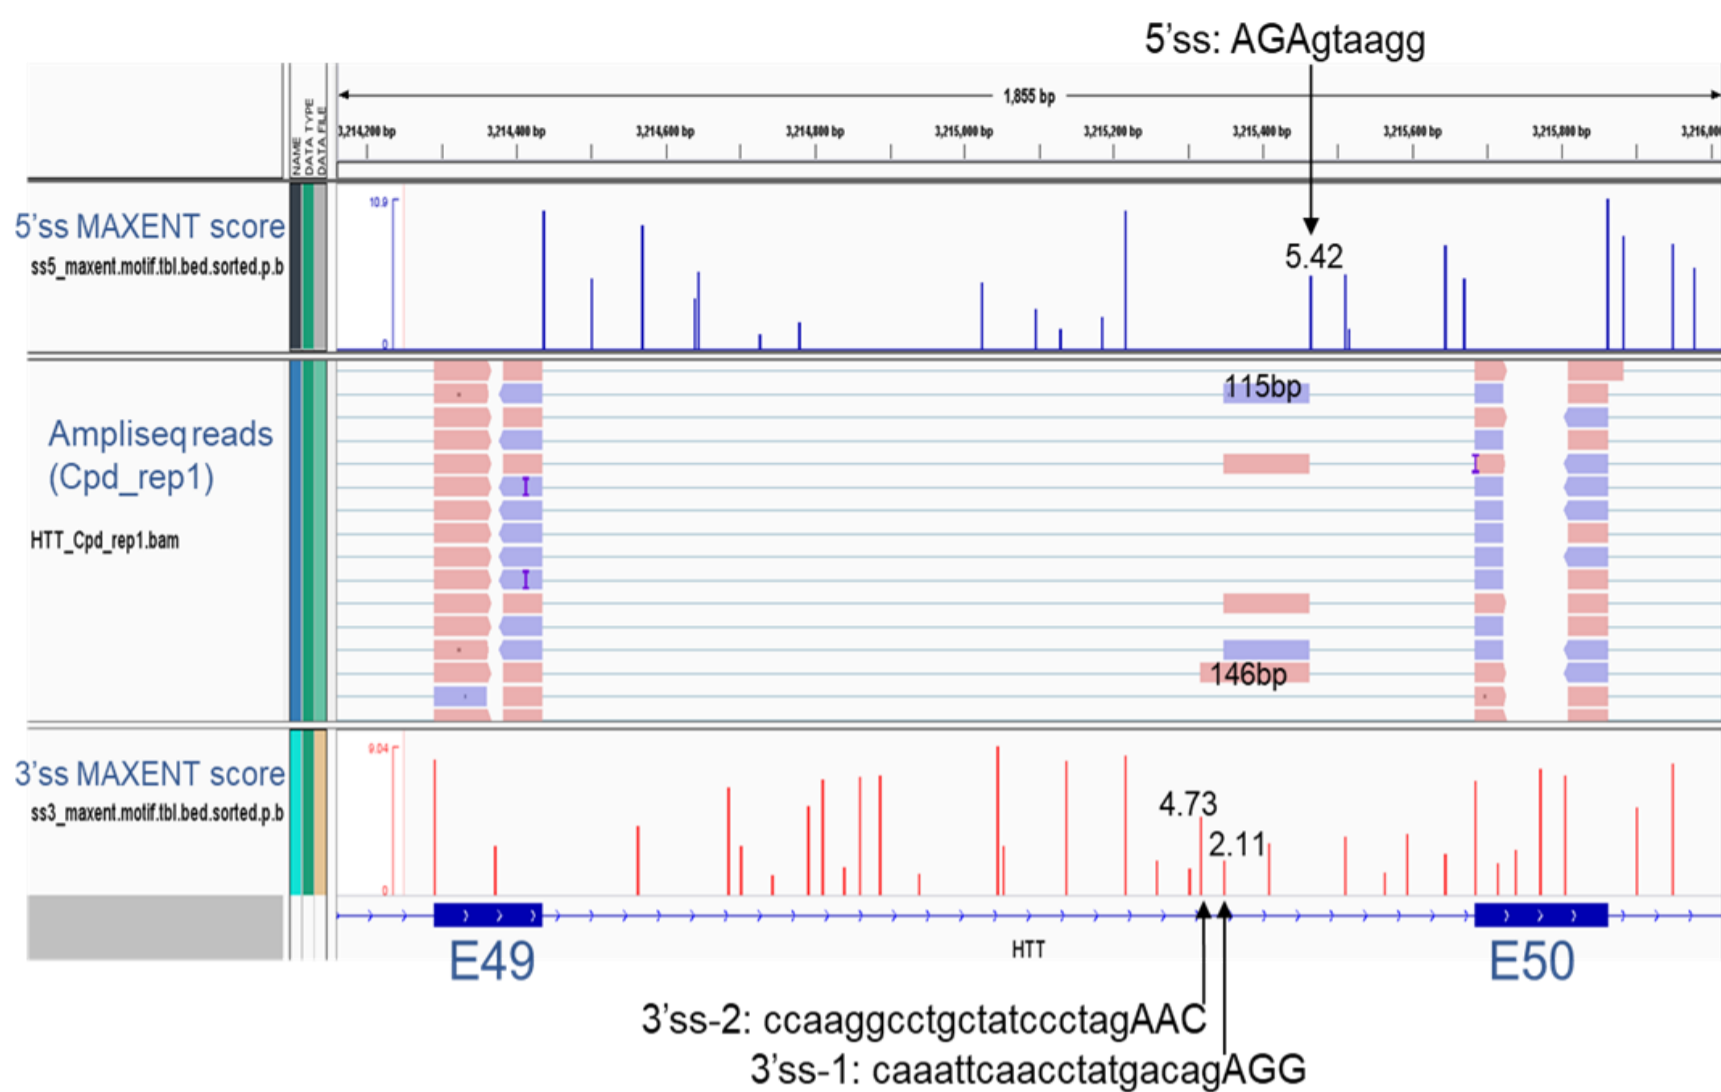

**Supplementary fig. 3. Analysis of the human huntingtin gene (*HTT*) psiExon 49 and compound-induced inclusion of premature stop-codon leading to nonsense-mediated mRNA decay**

Integrative Genomics Viewer visualisation of AmpliSeq read mapping of one of the HTT-C1-treated cells.

The inclusion of psiExon49a can be seen by a few reads in the view. The 5' splice sites (ss) and 3'ss sequences and their MAXENT scores are also shown. The figure also indicated the reads supporting two different sizes of psiExon (115nt and 146nt) comprised of the using the same 5'ss, but different 3'ss 31 nucleotides apart from each other.

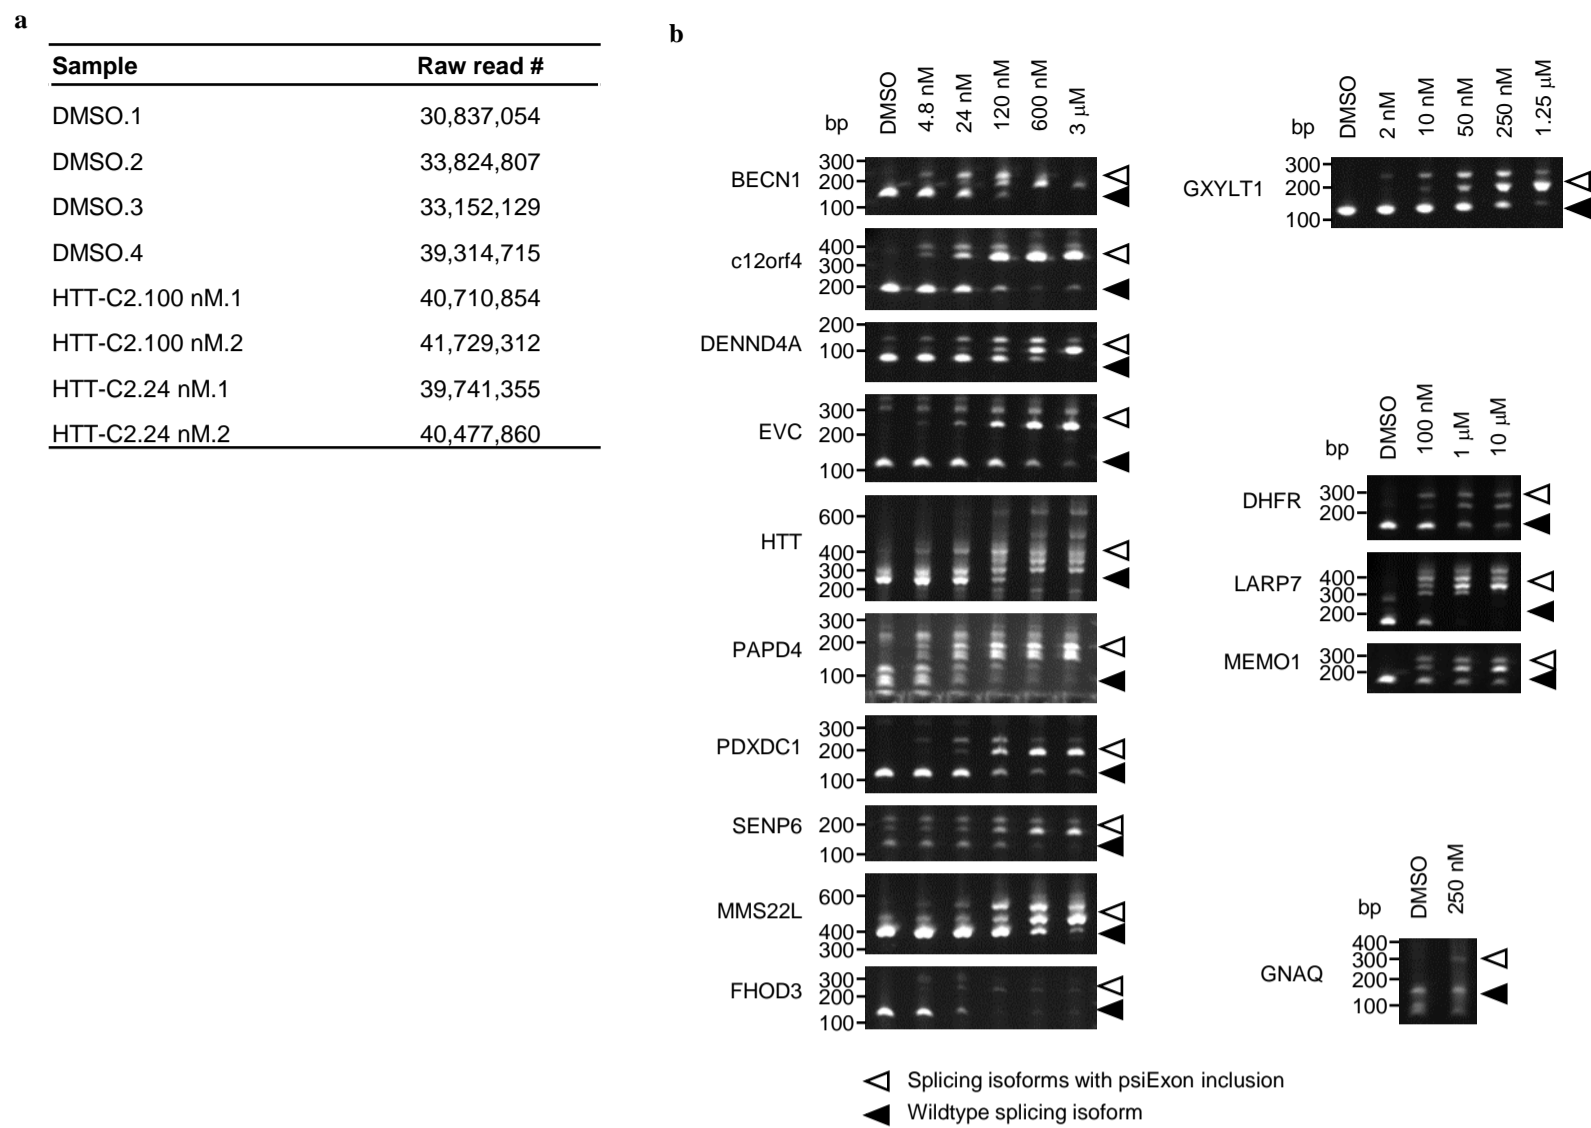

#### Supplementary fig. 4. RNA-Seq analysis of transcriptome changes

**a** RNA-Seq analysis of transcriptome changes in human SH-SY5Y cells treated with a close analogue of HTT-C1, HTT-C2 or control dimethyl sulphoxide (DMSO). Raw read # shown for each treatment. **b** Reverse transcription-polymerase chain reaction (RT-PCR) results showing validation of RNA-Seq-identified psiExon inclusion events in the human huntingtin gene (*HTT*) and several other genes following treatment with HTT-C2 or control (DMSO). The data is from multiple dose-response experiments; most primer sets have been used multiple times ( $n > 3$ ) on independent biological replicates.

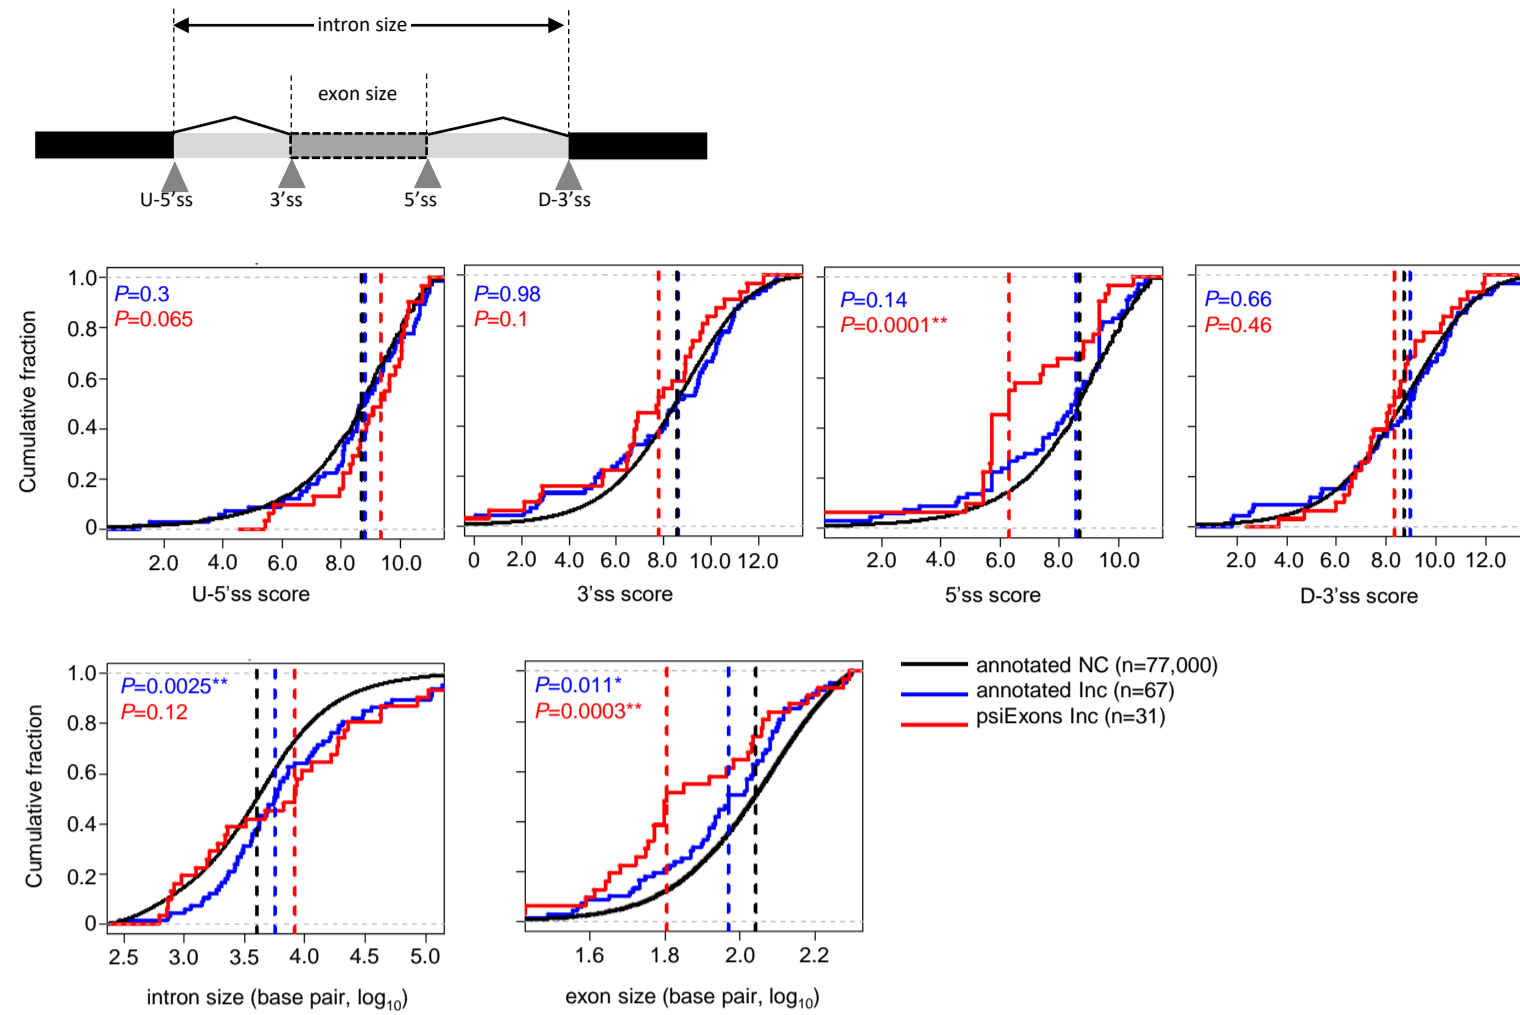

### Supplementary fig. 5. Features of psiExons activated by HTT-C2

Analysis of 31 novel psiExon inclusion events identified through RNA-Seq analysis, showing that these psiExons are shorter and have significantly weaker 5' splice sites (ss) than annotated unaffected exons. *P*-values are based on Wilcoxon rank-sum test comparing a group of exons with "annotated NC" group exons. *P*-values are not adjusted for multiple comparisons. The median value of each group was shown as a dotted vertical line.

| Compound | Structure                                                                         | SMN protein increase (EC <sub>1.5x</sub> ), nM* | HTT protein lowering activity (IC <sub>50</sub> ), nM |
|----------|-----------------------------------------------------------------------------------|-------------------------------------------------|-------------------------------------------------------|
| HTT-C2   | 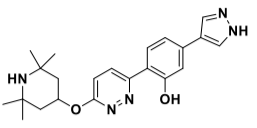 | 47                                              | 12                                                    |
| SMN-C3   |  | 89                                              | 2043                                                  |

**Supplementary fig. 6. Comparing survival motor neuron (SMN) and huntingtin (HTT) activities for HTT-C2 and SMN-C3**

The methods and conditions utilized to perform the homogeneous time resolved fluorescence survival motor neuron (HTRF SMN) protein assay in patient fibroblasts GM03813 (Coriell Institute) were described previously (See Naryshkin *et al*, 2014<sup>1</sup>)

a

| Sample  | Raw read # |
|---------|------------|
| mock.1  | 27,953,629 |
| mock.2  | 40,095,473 |
| U1-GA.1 | 38,286,691 |
| U1-GA.2 | 38,783,671 |

b

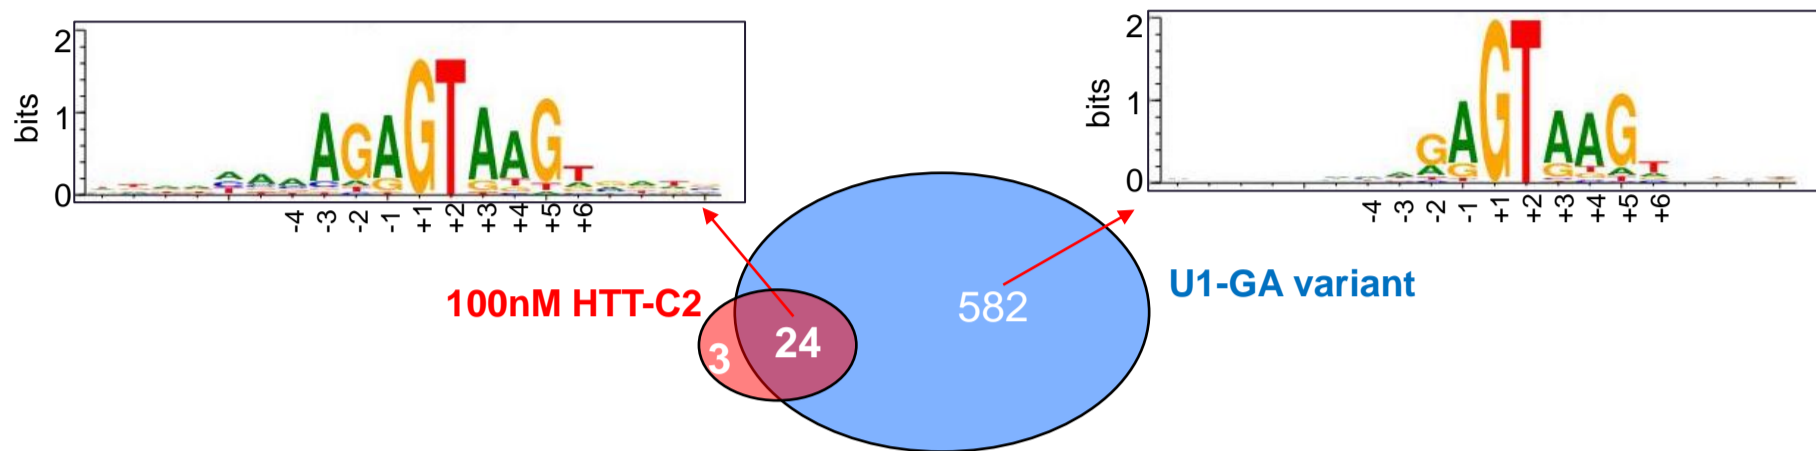

**Supplementary fig. 7. psiExons identified from U1-GA variant treatment of HEK293 cells**

**a** Read raw counts of the RNA-Seq from U1-GA variant treatment or mock controls. **b** Venn diagram showing the overlap of psiExons identified from 100nM HTT-C2 treatment and U1-GA variant treatment.

Sequence logo of the 5' splice sites (ss) sequences were also shown for indicated subsets of psiExons.

**a Multiple species sequence alignment of *HTT*-psiExon49a 5' and 3' splice sites**

**3'ss (hs -50 to +12):**

```

caaggcctgctatccctagaacccacgctctCAAATTC AAC-----C-----TATGACAG (AGGCAAGCCCTG Human
caaggcctgctatccctagaacccacgctctCAAATTC AAC-----C-----TATGACAG (AGGCAAGCCCTG Chimp
caaggcctgctatccctagaacccacgctctCAAATTC AACCTCTGAGGC-----TATGACAG (AGGCAAGCCCG Gorilla
caaggcctgctatccctagaacccacgctctCAAATTC AACCTCTGAGGC-----TATGACAG (A-GCAGGCCCG Orangutan
caaggcctgctatccctagaacccacgctctCAAATTC AACCTCTGAGGC-----TATGACAG (AGGCAAGCCCA Gibbon
caaggcctgctatccctagaacccacgctctCAAATTC AACCTCTGAGGC-----TATGCCAG (AGGCAAGCCCA Rhesus
caaggcctgctatccctagaacccacgctctCAAATTC AACCTCTGAGGC-----TATGCCAG (AGGCAAGCCCA Crab-eating macaque
caaggcctgctatccctagaacccacgctctCAAATTC AACCTCTGAGGC-----TATGCCAG (AGGCAAGCCCA Baboon
caaggcctgctatccctagaacccacgctctCAAATTC AACCTCTGAGGC-----TATGACAG (AGGCAAGCCCA Green monkey
CAATGCCTGATATCCCTAGAACCTATGCTCTCAAATTC AAC-TCTGAGGC-----TATGACAG (AGGCAAGCCCTG Marmoset
CAATGCCTGATATCCCTAGAACCTATGTTCTCAAATTC AAC-TCTGAGGC-----TATGACAG (AGGCAAGCCCTG Squirrel monkey
taagtctgtgttccagagctcatgctctGAAATGCAGTCTCTGTGTT-----TATGATAG (CAGCTACCCT-- Bushbaby
-----ACTCATAAATAACTCCCAAACCTCAGC-TGTGTGGC-----TGAG---- (--AAAAATTCT- Chinese hamster
-----c-----TAGTCATAATCATACTCCAAAACCTCAGT-GTGTGACTGAGATACAAAAACAAACACATTCCTGTTCTTTAA-- (--AAAAAGTCCA Mouse
-----c-----TAGTCATAATCATACTCCAAAACCTCAGT-GTGTGACTGAGATACAAAAACAAACACATTCCTGTTCTTTAA-- (--AAAAAGTCCA Rat
caagtctgtgttccagagctcatgctctGAAATGCAGTCTCTGTGTT-----TGCA---- (--GTGAGCCT-- Guinea pig
-----c-----TAGTCATAATCATACTCCAAAACCTCAGT-GTGTGACTGAGATACAAAAACAAACACATTCCTGTTCTTTAA-- (--AAAAAGTCCA Rabbit
cagtcgc-----gctgtgaggttcagccctgtgac-----tacGGCCG (AGGCAAGGCCCT Pig
-----c-----TAGTCATAATCATACTCCAAAACCTCAGT-GTGTGACTGAGATACAAAAACAAACACATTCCTGTTCTTTAA-- (--AAAAAGTCCA Sheep
caatcctgcatctccaggaccatgctctCAGATTCAGCCT-----(-GGCAGAGCCCTG Dog

```

**5'ss (human -24 to +10):**

```

GCTG-AAGGAGAGA--GAGGCAG-CAG---A) GT--AAG--GGGGC Human
GCTG-AAGGAGAGA--GAGGCAG-CAG---A) GT--AAG--GGGGC Chimp
GCTG-AAGGGGAGA--GAGGCAG-CAG---A) GT--AAG--GGGGC Gorilla
GCTG-AAGAAGAGA--GAGGCAG-CAG---A) GT--AAG--GGGGC Orangutan
ACTGAAAGGAGAGA--GAGGCAG-CAG---A) GT--AAG--GGGGC Gibbon
GCTG-AAGGAGAGA--AGGGCAG-CAG---A) GTT-AAG--GGGGC Rhesus
GCTG-AAGGAGAGA--AGGGCAG-CAG---A) GTT-AAG--GGGGC Crab-eating macaque
GCTG-AAGGAGAGA--GAGGCAG-CAG---A) GT--AA--GGGGC Baboon
GCTG-AAGGAGAGA--GAGGCAG-CAG---A) GTT-AAG--GGGGC Green monkey
GCTG-AAGGAGAGA--GAGTTAG-CAG---A) GT--AAG--GGGC Marmoset
GCTG-AAGGAGAGA--GAGTTAG-CAG---A) GT--AAG--CGGGA Squirrel monkey
ACTG-AAAGATAAA--GGAGGGCCAG---A) GT--CAGGAGGGGC Bushbaby
TCTA-AAGGTAGAA--GATATCT-GGG---G) T---GGT--TGTGT Chinese hamster
TCTA-AAGGAAAA--GACACCT-AGGGTAA) ----GGT--TGGGC Mouse
TCTA-AAGGAAAA--GACACCT-GGG---A) ----GGT--TGGGC Rat
GCTG-AAGGAGAA--GAAGCCA-CCA----) ----GAG--TGGG Guinea pig
GCAC-AAGGACACA--GAGGCAG-CGA---G) CA--AGG--TGGGC Rabbit
GTGC-CAGG--AGGGAGGGCAG-CCA---G) CGTCCTG--CTG-- Pig
-----c-----TAGTCATAATCATACTCCAAAACCTCAGT-GTGTGACTGAGATACAAAAACAAACACATTCCTGTTCTTTAA-- (--AAAAAGTCCA Sheep
GCCG-AAGGAAGGA--GGAACAA-TGA---A) ATCAGGG--TGGCC Dog

```

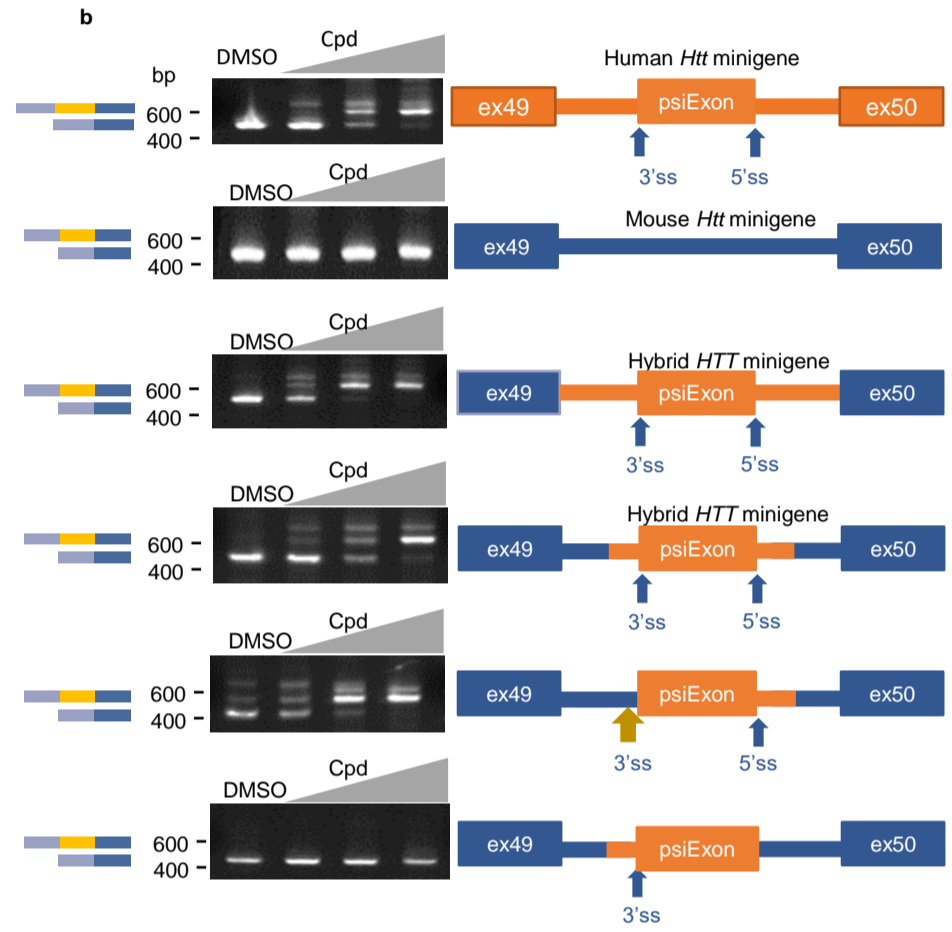

**c Putative psiExons with AGAgtaag 5'ss in human *HTT* gene in addition to stop-codon psiExon49a**

| intron ID | 5'ss    | 3'ss    | 5'ss sequence | exon size |
|-----------|---------|---------|---------------|-----------|
| 1         | 3086401 | 3086298 | GACAGAgtaaga  | 104       |
| 8         | 3121109 | 3120933 | ATTAGAgtaaga  | 177       |
| 40        | 3191727 | 3191630 | TATAGAgtaaga  | 98        |
| 40        | 3193650 | 3193535 | ACTAGAgtaaga  | 116       |

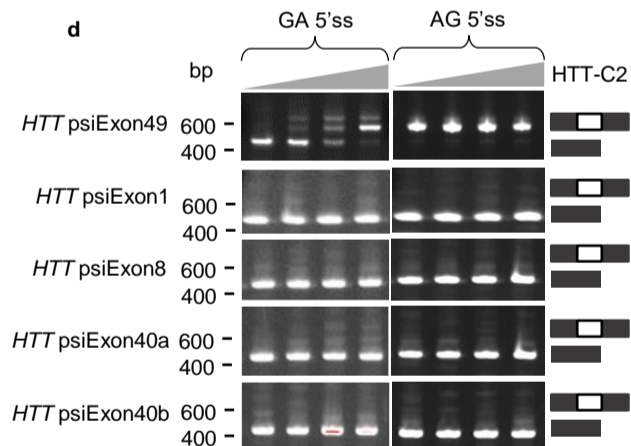

**e iExon HTT 49a: strong enhancer**

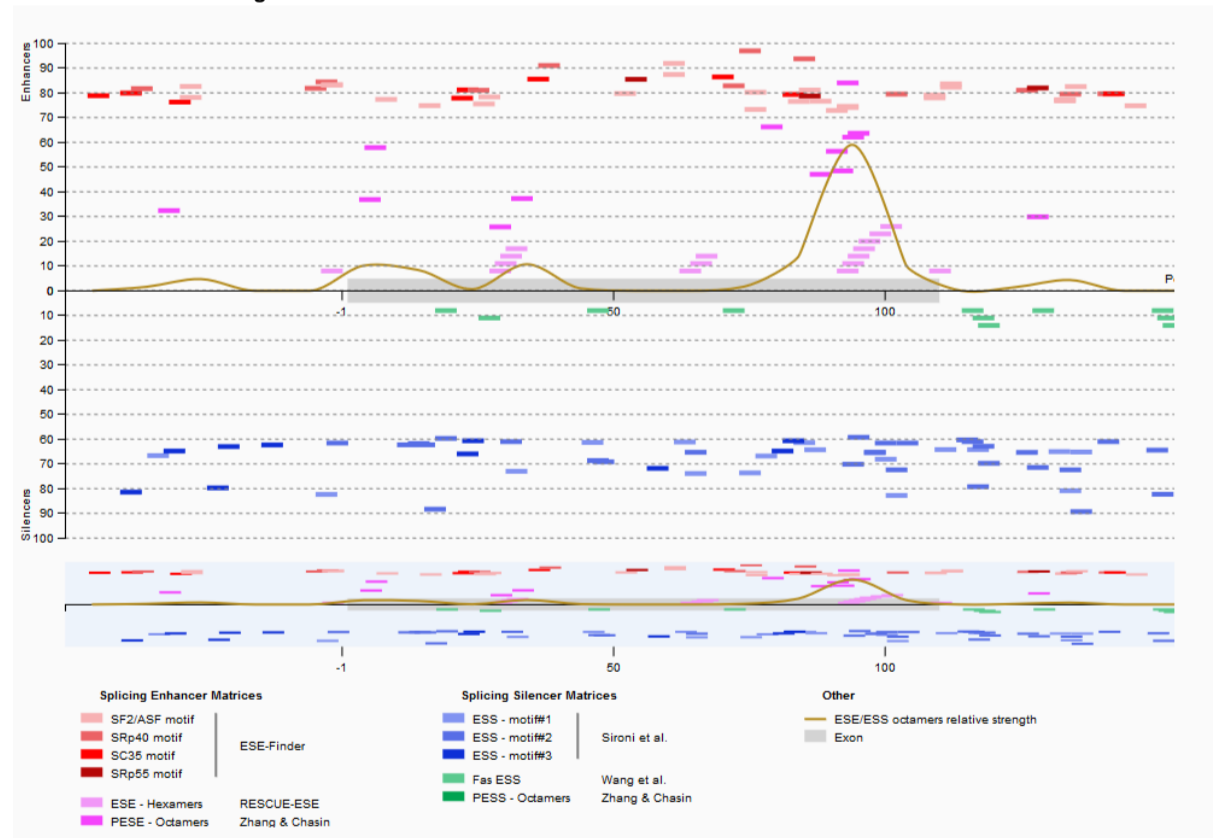



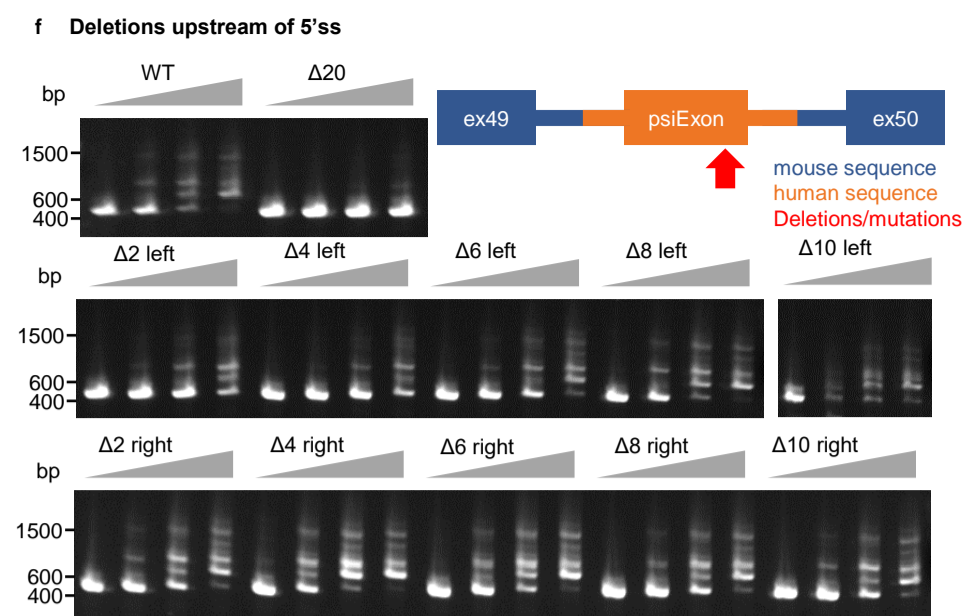

| Construct     | nucleotide -38 to -19 |
|---------------|-----------------------|
| WT (control)  | CAGGAGCCACAGCGCTGAA   |
| A = Δ20       | -----                 |
| B = Δ2 left   | --GGAGCCACAGCGTGAA    |
| C = Δ4 left   | ----AGCCACAGCGTGAA    |
| D = Δ6 left   | -----CCACAGCGTGAA     |
| E = Δ8 left   | -----CACAGCGTGAA      |
| F = Δ10 left  | -----CAGCGTGAA        |
| G = Δ2 right  | CAGGAGCCACAGCGTG--    |
| H = Δ4 right  | CAGGAGCCACAGCGC----   |
| I = Δ6 right  | CAGGAGCCACAGC-----    |
| J = Δ8 right  | CAGGAGCCACA-----      |
| K = Δ10 right | CAGGAGCCCA-----       |

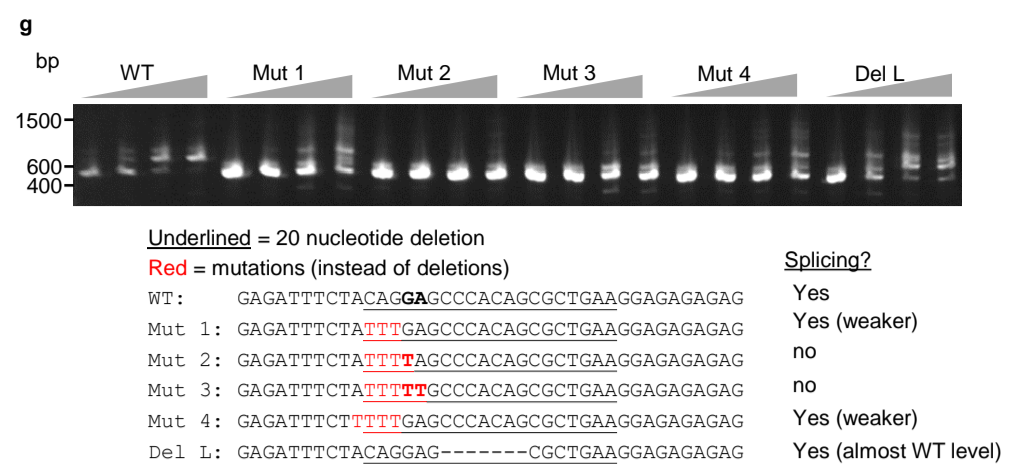

**Supplementary fig. 8. Mouse and human minigene experiments conducted to characterise the upstream exonic splicing enhancers (ESE) required for compound-induced psiExon inclusion**

**a** Multiple species sequence alignment of the human huntingtin gene (*HTT*)-psiExon49a 5' and 3' splice sites (ss). **b** Effect of various 3' and 5'ss configurations on *HTT* / mouse huntingtin gene (*Htt*) splicing in minigenes using mouse or human sequences following treatment with either dimethyl sulphoxide (DMSO) or HTT-C2. **c** Putative psiExons with AGAgtaag 5'ss in human *HTT* gene in addition to **Stop-Codon** psiExon49a. **d** Splicing assay using *HTT* intron 49 and *HTT* intron 1, 8 and 40 minigene constructs with either wild-type (wt) noncanonical (GA) or mutant canonical (AG) nucleotides at the -2, -1 positions. The data is from a single transfection experiment with multiple concentrations tested for a given construct; the "WT" control construct has been used multiple times (n>3). **e** Bioinformatic analysis of *HTT* **Stop-Codon** psiExon49a, identifying a number of potential sequences that could function as ESEs upstream of the 5'ss. **f** Effect of partial deletions upstream of the 5'ss on psiExon inclusion. The data is from a single transfection experiment with multiple concentrations tested for a given construct; the "WT" control construct has been used multiple times (n>3). **g** Effect of various mutations in the region upstream of the 5'ss on psiExon inclusion. The data is from a single transfection experiment with multiple concentrations tested for a given construct; the "WT" control construct has been used multiple times (n>3).

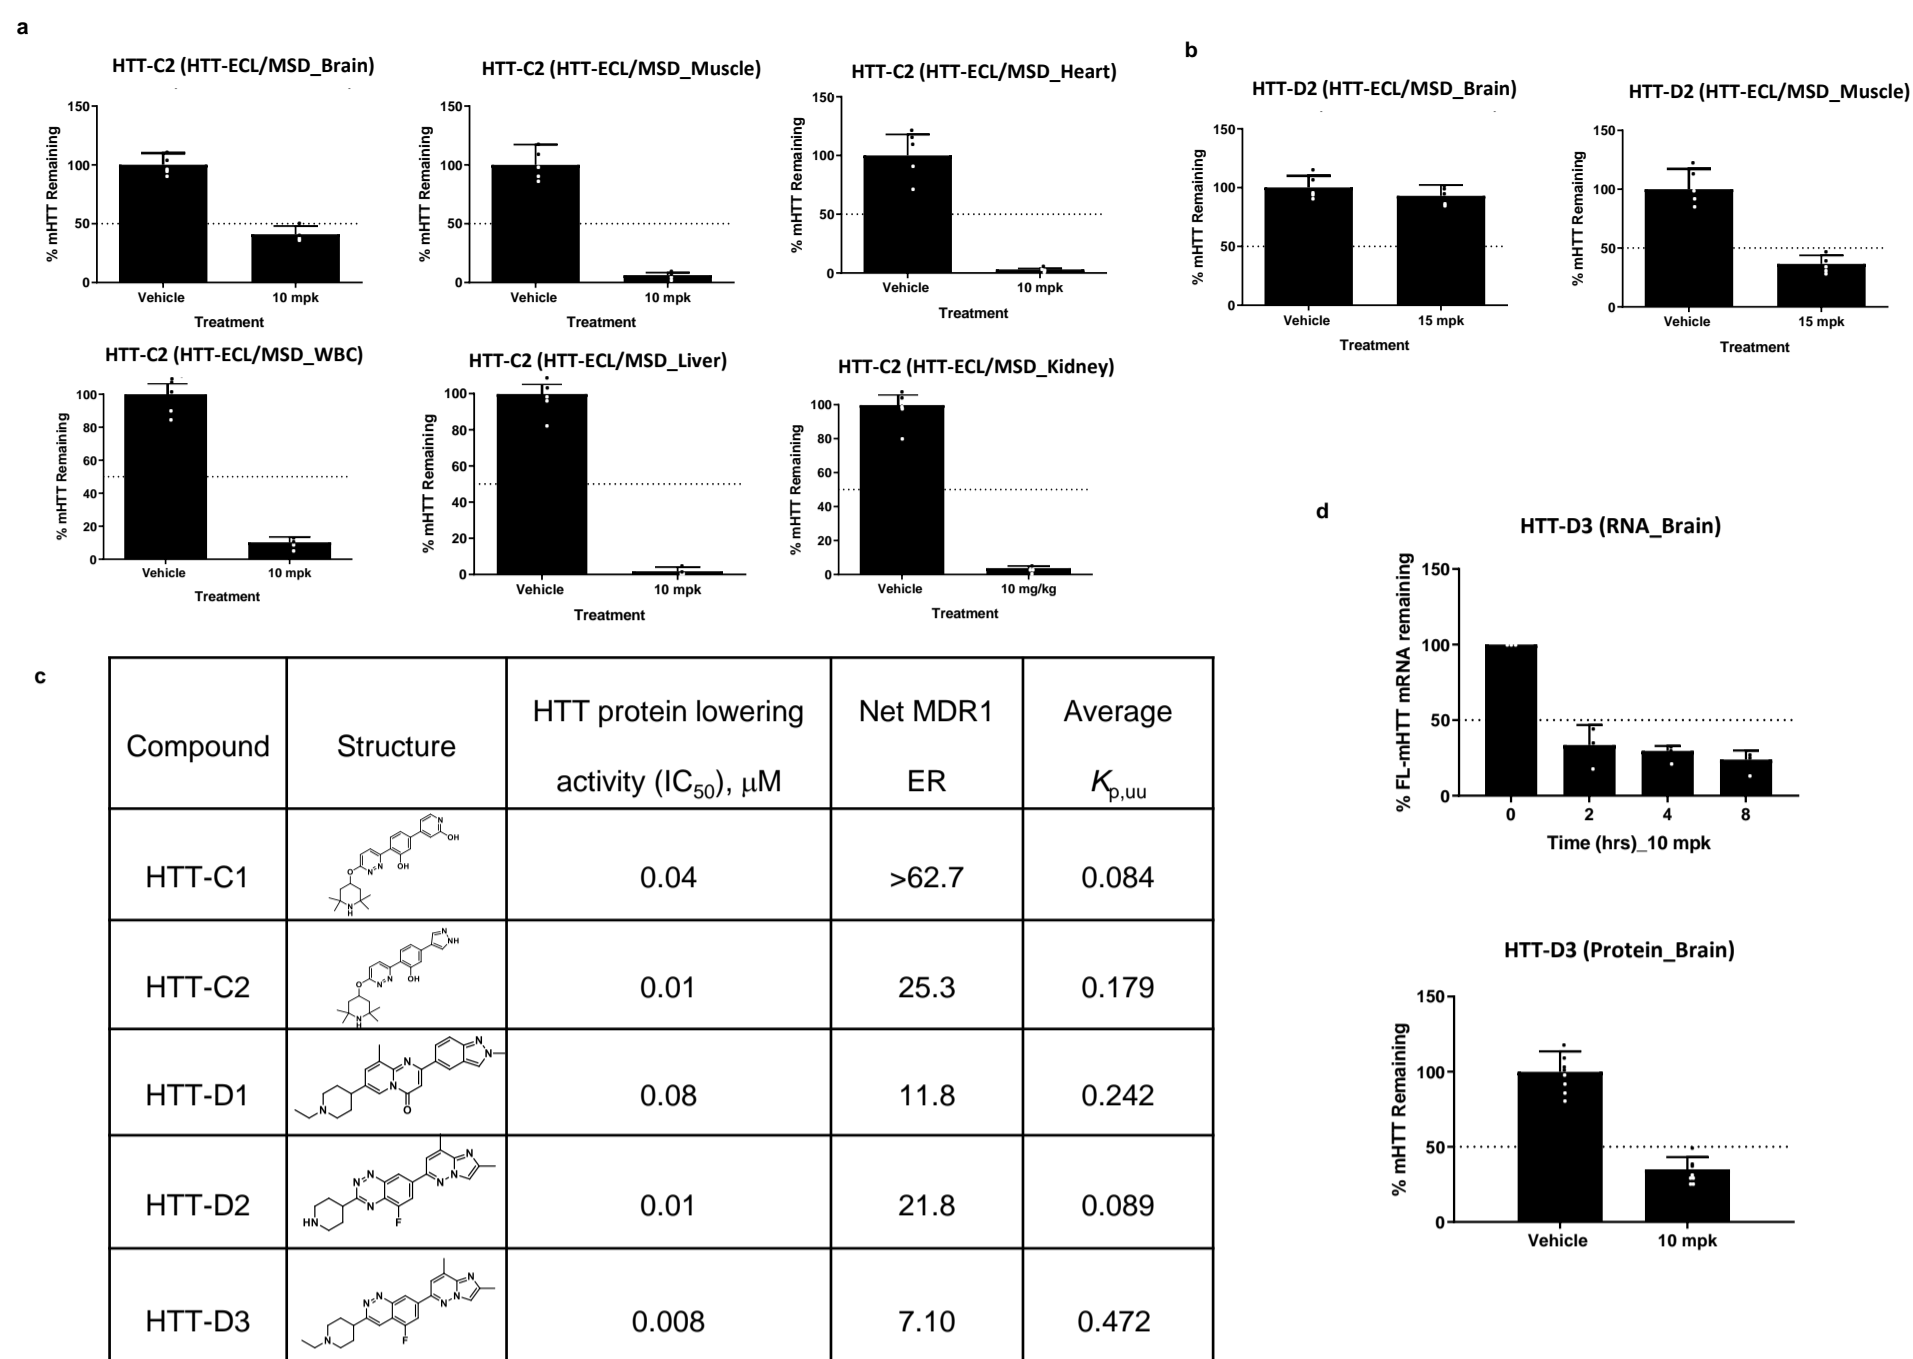

**Supplementary fig. 9. HTT-C and -D series compounds and their huntingtin (HTT)-lowering effects in various mouse tissues**

**a** Electrochemiluminescence (ECL) analysis of human HTT protein expression levels within different tissues of BACHD mice treated with 10 mg/kg HTT-C2. Graphs show percent lowering relative to vehicle control and normalised to Kirsten rat sarcoma viral oncogene homolog (KRAS), except for white blood cells (WBC). RT-qPCR and protein data represent mean  $\pm$  standard deviation (SD) (error bars) of five (n=5) animals per data point. **b** ECL analysis of human HTT protein expression levels in the brains and muscles of BACHD mice treated with 15 mg/kg HTT-D2. Graphs show percent lowering relative to vehicle control and normalised to KRAS. RT-qPCR and protein data represent mean  $\pm$  SD (error bars) of five (n=5) animals per data point. **c** Chemical structures, HTT protein-lowering activity, P-glycoprotein efflux (as measured by Madin-Darby canine kidney cells multidrug resistance 1 [MDCK-MDR1] permeability assay), and unbound brain partition coefficients ( $K_{p,uu}$ ) of HTT-C and -D series compounds. **d** mHTT mRNA and protein lowering in BACHD mouse brains following treatment with HTT-D3. Graphs show percent lowering relative to vehicle control. RT-qPCR and protein data represent mean  $\pm$  SD (error bars) of five animals per data point.

5'ss -2 to -1 position sequences for human Refseq-annotated transcripts

Number = 231,362

|    | Numbers | Fractions |
|----|---------|-----------|
| AG | 127562  | 0.55135   |
| TG | 26796   | 0.11582   |
| GG | 23059   | 0.09967   |
| CG | 14035   | 0.06066   |
| AA | 9824    | 0.04246   |
| CT | 5270    | 0.02278   |
| AT | 5201    | 0.02248   |
| CA | 5008    | 0.02165   |
| GA | 3113    | 0.01346   |
| AC | 2586    | 0.01118   |
| GT | 1840    | 0.00795   |
| TT | 1786    | 0.00772   |
| CC | 1751    | 0.00757   |
| GC | 1328    | 0.00574   |
| TA | 1164    | 0.00503   |
| TC | 1039    | 0.00449   |

**Supplementary fig. 10. Canonical (AG) vs. noncanonical nucleotides in the -2, -1 positions in the 5' splice sites (ss) in human Refseq-annotated transcripts**

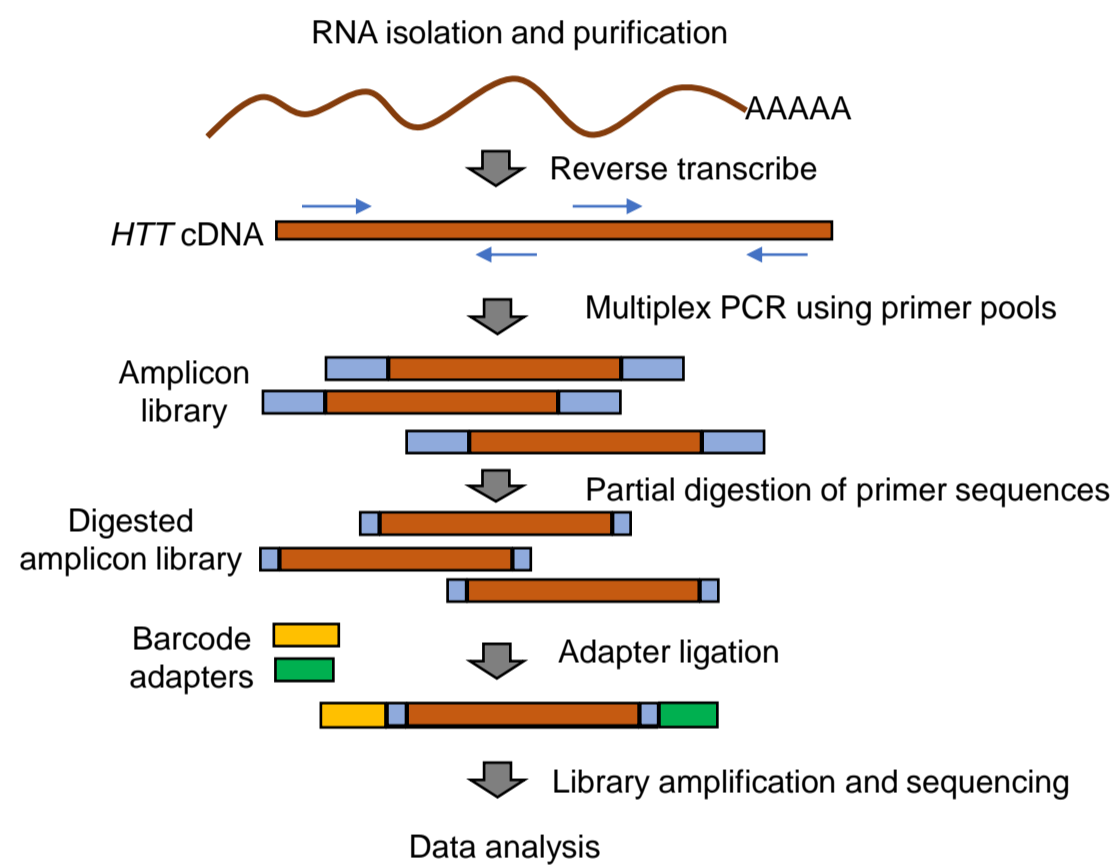

**Supplementary fig. 11. AmpliSeq workflow and junction expression index (JEI) calculation**

AmpliSeq workflow for polymerase chain reaction (PCR) enrichment of the huntingtin (*HTT*) exon targets.

## Supplementary Tables

### Supplementary table 1

#### RT-qPCR primers and probes used to quantify *HTT* and *GADPH* mRNA levels

| Assay mix    | Primer/probe                              | Sequence                  | Final concentration |
|--------------|-------------------------------------------|---------------------------|---------------------|
| <i>HTT</i>   | Hs00918174_m1 Taqman Gene expression, 20X | -                         | 1X                  |
|              | Forward primer                            | CAACGGATTTGGTCGTATTGG     | 100 nM              |
| <i>GAPDH</i> | Reverse primer                            | TGATGGCAACAATATCCACTTTACC | 100 nM              |
|              | Probe                                     | CGCCTGGTCACCAGGGCTGCT     | 75 nM               |

*HTT*, Huntingtin gene; *GAPDH*, glyceraldehyde 3-phosphate dehydrogenase.

### Supplementary table 2

#### Primer sets used for primer walking assay

| Forward primer             | Reverse primer              | <i>HTT</i> Exon Boundary | Expected Amplicon Size (bp) |
|----------------------------|-----------------------------|--------------------------|-----------------------------|
| CGGCTGTGGCTGAGGAG          | CCAAGGTCTCCTGGACTGAT        | Exon 1-Exon 6            | 453                         |
| CTGGATCAGCAGTGAGCATCT      | TTGAAAGGACAGGGCTGCAT        | Exon 7-Exon 10           | 498                         |
| TGACTCTGAATCGAGATCGGATGT   | CAGAAGGCTGCCTGCAGT          | Exon 11-Exon 14          | 563                         |
| GACTCTGCACCTCTTGTCATT      | CTGTCCTCAGAGTCAGCACAT       | Exon 15-Exon 19          | 548                         |
| GGTGAGCTTTTTGGAGGCAAA      | GGTCAGAATCATTGTGGCCATC      | Exon 20-Exon 25          | 580                         |
| ACCTGCTGAAGGTGATTAACATTTGT | GGGTTGGAAGATAAGCCATCAAA     | Exon 26-Exon 31          | 574                         |
| CAGAAAGTGTCTACCCAGTTGAAGA  | AGACAGTCGCTTCCACTTGTC       | Exon 32-Exon 37          | 640                         |
| TCCGTCCGGTAGACATGCT        | AAGTCAGAATCCTCCTCTTCTCCA    | Exon 38-Exon 42          | 709                         |
| CAGCGGCCCTGTTCATCCA        | CAGAAATTTCACTCATCCCTAGGCTTA | Exon 43-Exon 48          | 625                         |
| TGCCAGTCATTTGCACCTT        | TCTCCTCCTGCTCCATCA          | Exon 49-Exon 54          | 756                         |
| CCAGCTGTAAGCTGCTTGGGA      | GTGCACCCTTCGCAGTTC          | Exon 55-Exon 60          | 630                         |
| CACTGCCAAGCAGCTCATC        | GTTGGAGAGGGACAGCATGAC       | Exon 61-Exon 66          | 736                         |

bp, base pair; *HTT*, Huntingtin gene.

### Supplementary table 3

#### Gene Expression Assays (20X)

| Assay Name                            | Oligonucleotide                           | Sequence                  | Final Concentration in Reaction |
|---------------------------------------|-------------------------------------------|---------------------------|---------------------------------|
| <i>HTT</i> assay<br>(Thermo Fisher)   | Hs00918159_m1 TaqMan Gene Expression: 60X | -                         | 1X                              |
| <i>GAPDH</i> assay<br>(Thermo Fisher) | Forward primer                            | CAACGGATTTGGTCGTATTGG     | 100 nM                          |
|                                       | Reverse primer                            | TGATGGCAACAATATCCACTTTACC | 100 nM                          |
|                                       | Probe                                     | CGCCTGGTCACCAGGGCTGCT     | 75 nM                           |

**Abbreviations:** *GAPDH*, glyceraldehyde 3-phosphate dehydrogenase; *HTT*, Huntingtin

### Supplementary table 4

#### Preparation of PCR Mix

| Reagent                       | Volume ( $\mu$ L) | Final Concentration |
|-------------------------------|-------------------|---------------------|
| RT-PCR buffer (2X)            | 5                 | 1X                  |
| RT-PCR enzyme mixture (25X)   | 0.4               | 1X                  |
| <i>HTT</i> Primer/Probe (60X) | 0.17              | 1X                  |
| <i>GAPDH</i> assay (20X)      | 0.5               | 1X                  |
| H <sub>2</sub> O              | 1.93              | -                   |

**Abbreviations:** *GAPDH*, glyceraldehyde 3-phosphate dehydrogenase primer; *HTT*, Huntingtin primer; PCR, polymerase chain reaction; RT-PCR, reverse transcriptase polymerase chain reaction

### Supplementary References

1. Naryshkin, N. A. et al. Motor neuron disease. SMN2 splicing modifiers improve motor function and longevity in mice with spinal muscular atrophy. *Science* **345**, 688–693 (2014).
